# Supplementary material
Source: PubMed Central journal article supplement (PMC8238485)
Supplement: advancesADV2020003272-suppl1.pdf [file advancesADV2020003272-suppl1.pdf]

## Supplementary figures

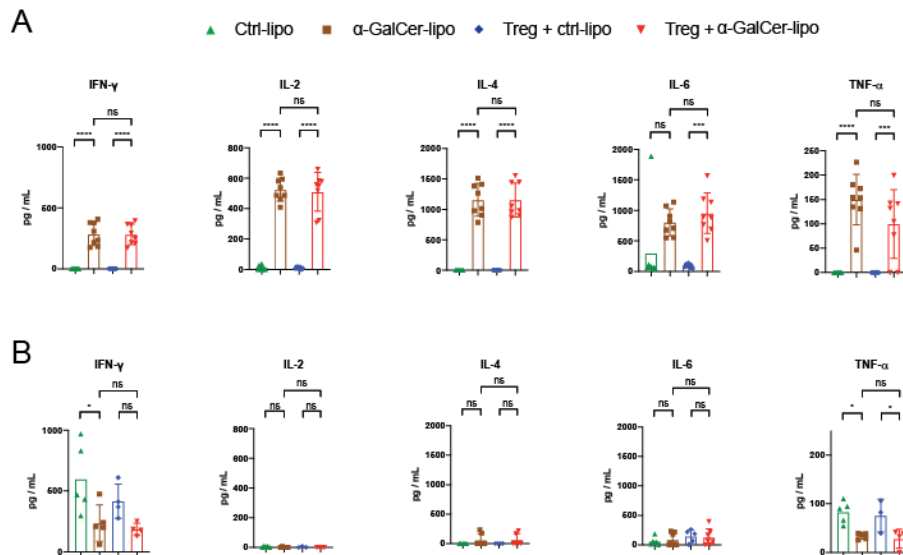

### Sup figure 1. Serum cytokine level at 2 hr and 10 day after bone marrow transplantation

Recipient BALB/c mice were irradiated 8.8-Gy and transferred C57BL/6 bone marrow cells plus Tcons with or without  $1.0 \times 10^5$  sorted Foxp3<sup>GFP+</sup> Tregs followed by administration of ctrl-lipo or α-GalCer-lipo. Serum samples were collected at 2 hr (A) and 10 day (B) after BMT. Mean  $\pm$  SD from pooled data of two independent experiments. P-value \* $<0.05$ , \*\* $<0.01$ , \*\*\* $<0.001$ , \*\*\*\* $<0.0001$  calculated by ordinary one way ANOVA with Holm-Sidak correction. ns: not significant.

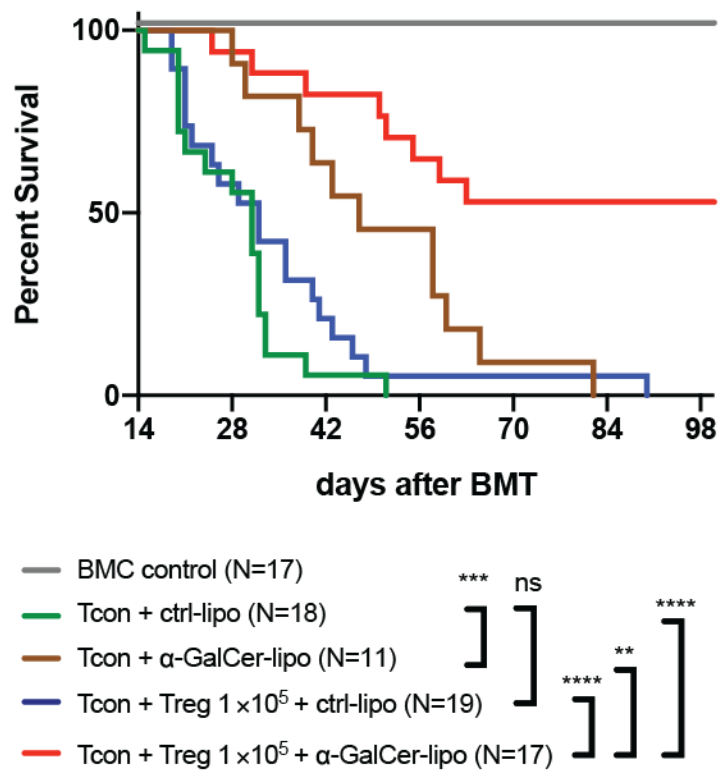

Sup figure 2. Murine survival curve from day 14 after BMT.

The mice that survived beyond day 14 were implemented into the analysis. P-value \*\*<0.01, \*\*\*<0.001, \*\*\*\*<0.0001 calculated by Log-rank test between indicated two groups. Pooled data of four independent experiments is shown. ns: not significant.

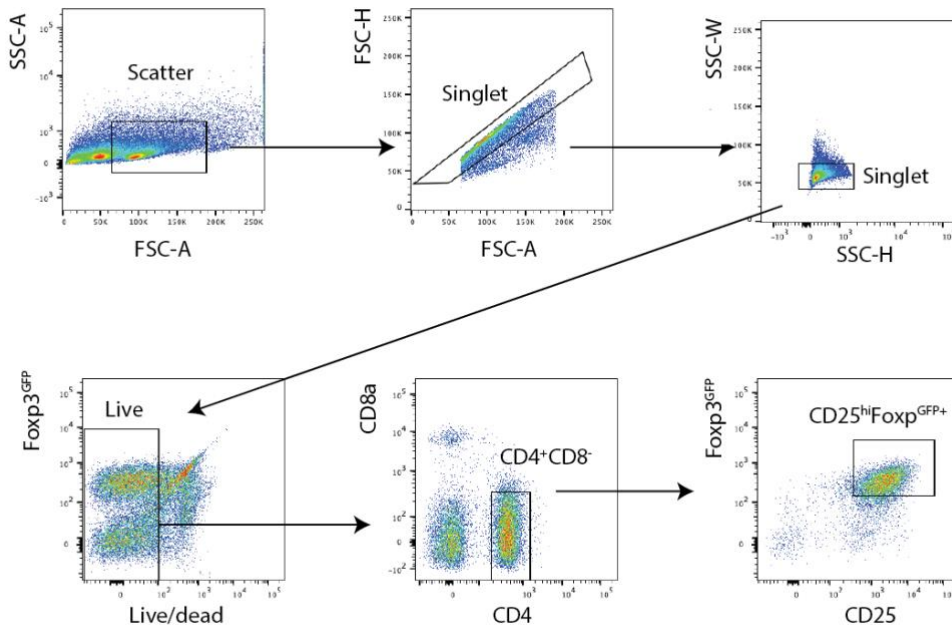

Sup figure 3. Sorting strategy for CD4<sup>+</sup>Foxp3<sup>GFP+</sup> Tregs.

CD25<sup>+</sup> cells were magnetic bead-enriched from single cell suspension obtained from secondary lymphoid tissues of B6-Foxp3<sup>GFP+</sup> mice, and further stained with CD4, CD8, and LIVE/DEAD Aquamine. CD4<sup>+</sup>CD8<sup>-</sup>CD25<sup>hi</sup>Foxp3<sup>GFP+</sup> cells were gated and acquired by flow cell sorter.

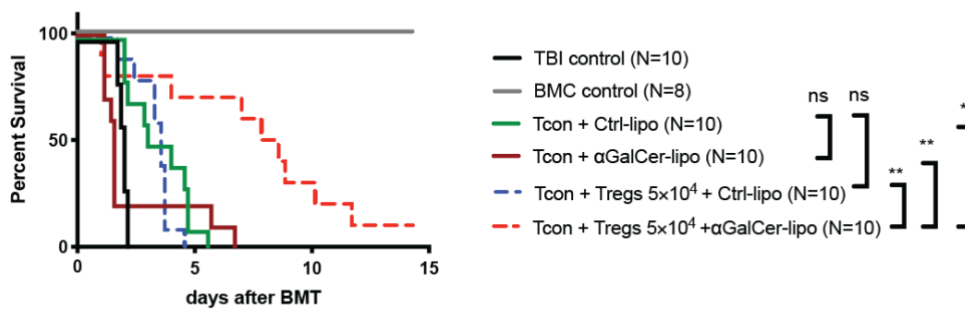

Sup figure 4. Administration of  $\alpha$ -GalCer-lipo significantly improved murine survival when combined with  $5 \times 10^4$  Treg transfer

Flow sorted Foxp3<sup>GFP+</sup> Tregs were injected into recipient mice at 1:20 Treg:Tcon ratio at the time of bone marrow transplantation. P-value \*\*\*<0.001, \*\*\*\*<0.0001 calculated by Log-rank test between indicated two groups. Pooled data of two independent experiments was shown.

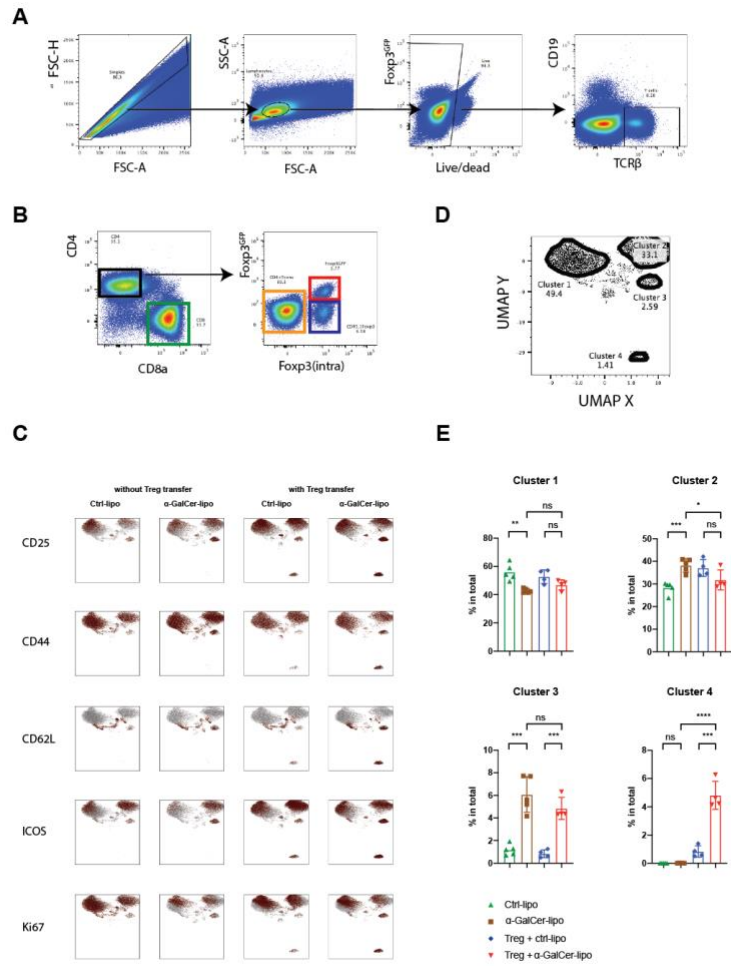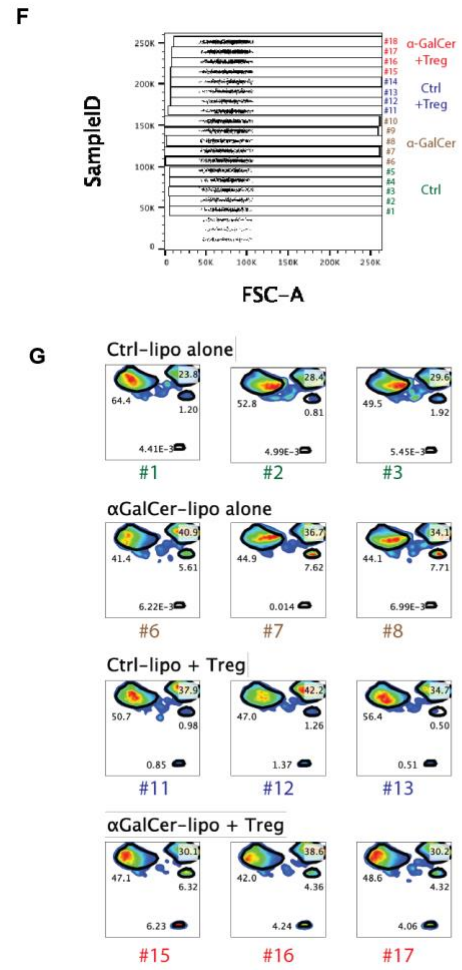

**Sup figure 5. Gating strategy for UMAP plot.**

(A) All data from one representative experiment were concatenated. Singlet-living lymphocytes were gated and TCR $\beta^+$ CD19 $^-$  gated cells were implemented for downstream analysis. UMAP was calculated according to expression level of CD4, CD8a, CD45.1, CD45.2, Foxp3 (intracellular stained), Foxp3<sup>GFP</sup>, CD25, CD44, CD62L, ICOS, and Ki67. (B) CD4<sup>+</sup>Foxp3 $^-$  cells (orange box: CD4<sup>+</sup> Tcons), CD8<sup>+</sup> cells (green box: CD8<sup>+</sup> Tcons), CD4<sup>+</sup>Foxp3<sup>+</sup>Foxp3<sup>GFP-</sup> cells (blue box: Tcon-derived Tregs), and CD4<sup>+</sup>Foxp3<sup>GFP+</sup> cells (red box: transferred Tregs) were gated, and overlaid on UMAP plot (main figure 2E). (C) CD25<sup>+</sup>, CD44<sup>+</sup>, CD62L<sup>+</sup>, ICOS<sup>+</sup>, and Ki67<sup>+</sup> cells (brown dots) that were overlaid on representative UMAP plot of each group. (D) Four major clusters (1 – 4) identified and gated for the following analysis. (E) The proportion of cluster 1 – 4 in each treatment group. P-value \*\*<0.01, \*\*\*<0.001, \*\*\*\*<0.0001 calculated by student t-test between indicated two groups. (F) Concatenated data was divided into an individual mouse by gating on each sample number; #1-5: Ctrl-lipo, #6-10:  $\alpha$ -GalCer-lipo, #11-14: Ctrl-lipo + Treg, #15-18:  $\alpha$ -GalCer-lipo + Treg. (G) UMAP plots gated on individual mouse. The data from one representative of two individual experiment. ns: not significant.

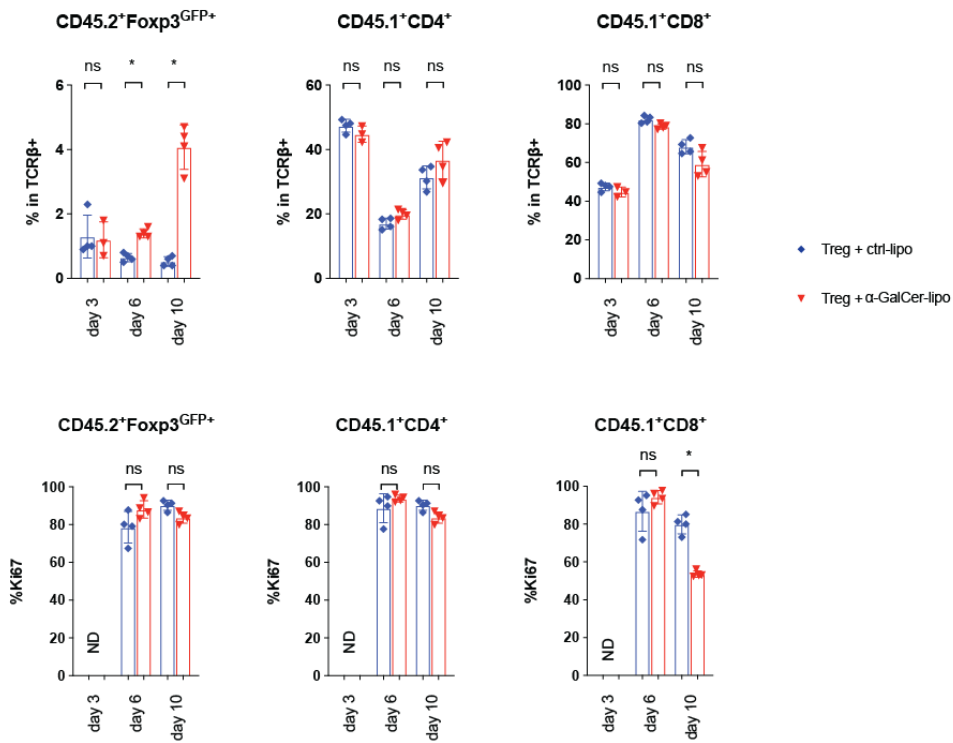

Sup figure 6. T cell phenotype on day 3, day 6, and day 10.

Splenocytes from ctrl- and α-GalCer-lipo treated recipients were obtained on day 3, day 6, day 10 after BMT and analyzed by Flow cytometry. The proportion (above) and Ki67 expression level (bottom) of CD4<sup>+</sup>Foxp3<sup>GFP+</sup> Tregs, CD45.1<sup>+</sup>CD4<sup>+</sup> Tcons, and CD45.1<sup>+</sup>CD8<sup>+</sup> Tcons at the indicated time points.

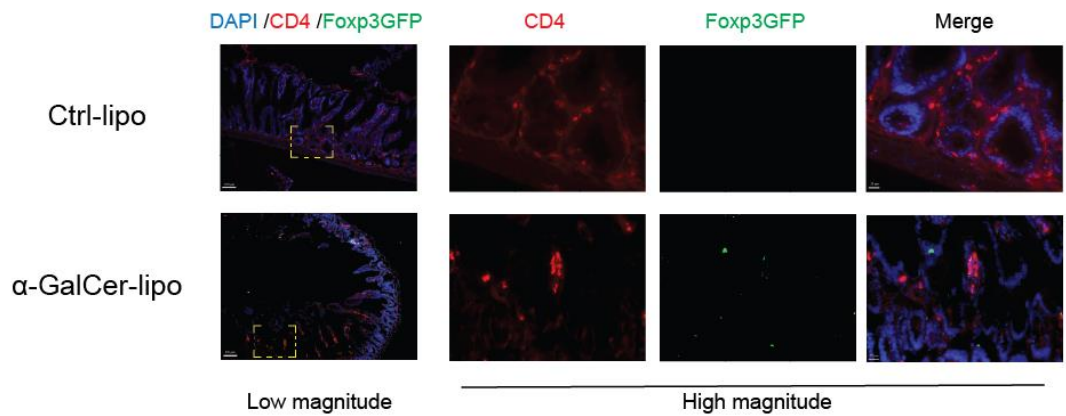

**Sup figure 7. Immunohistochemistry of small intestine**

Images of immunofluorescent staining for CD4 (red), Foxp3GFP (Green), and DAPI (Blue). Left; low magnification (10x, white bar indicates 100  $\mu$ m), right; high magnification of inset region (40x, white bar indicates 20  $\mu$ m). One representative image of four independent mice.
